# Supplementary figures and images for: Risk Factors Associated With Child Protective Services Involvement Among Parents With a Serious Mental Illness
Source: Atypon-hosted journal article supplement (doi:10.1176/appi.ps.202000036), 2020-09-10

**FIGURE 1. Sample and Recruitment**

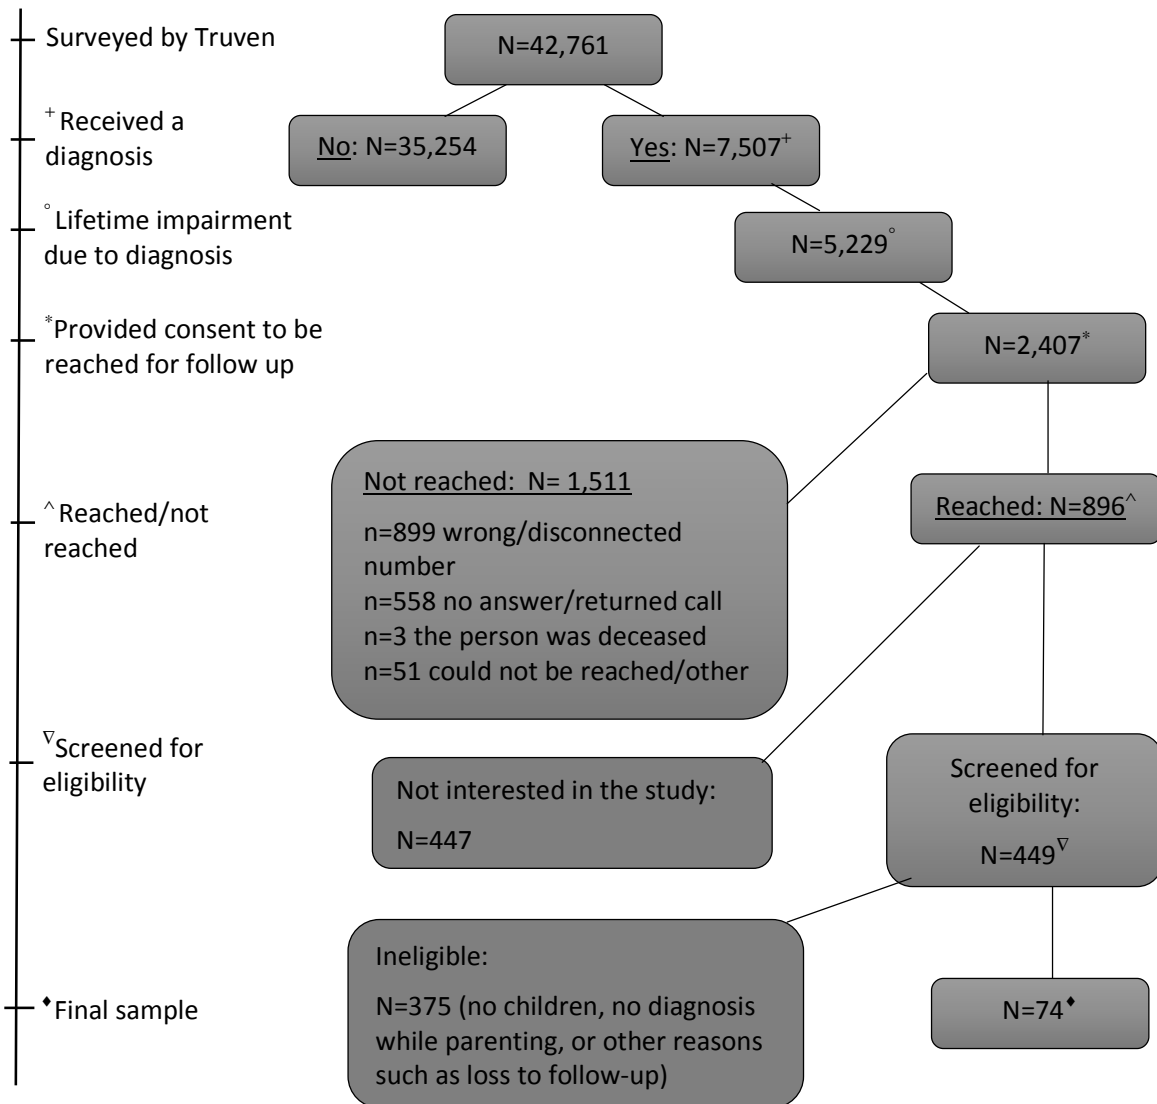

Supplement: appi.ps.202000036.ds001.pdf [file appi.ps.202000036.ds001.pdf]
